# Supplementary material for: Initial action output and feedback-guided motor behaviors in autism spectrum disorder
Source: Springer Nature journal article supplement (doi:10.1186/s13229-021-00452-8), 2021-07-10
Supplement: MOESM4 [file 19350158]

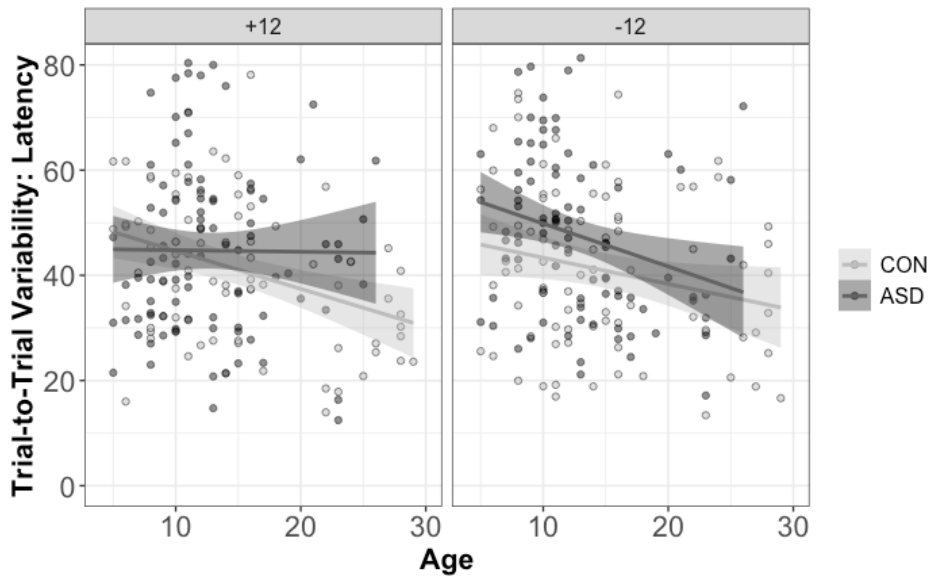

**Supplementary Figure 1.** Latency variability decreased with age in both groups for leftward saccades (-12 degree trials, group x age:  $\beta = -0.32$ ,  $t = -0.80$ ,  $p = .42$ ). For rightward saccades, control participants again showed age-related reductions in latency variability ( $\beta = -0.72$ ,  $t = -3.16$ ,  $p = .002$ ), while individuals with ASD did not ( $\beta = -0.03$ ,  $t = -0.09$ ,  $p = .93$ ).

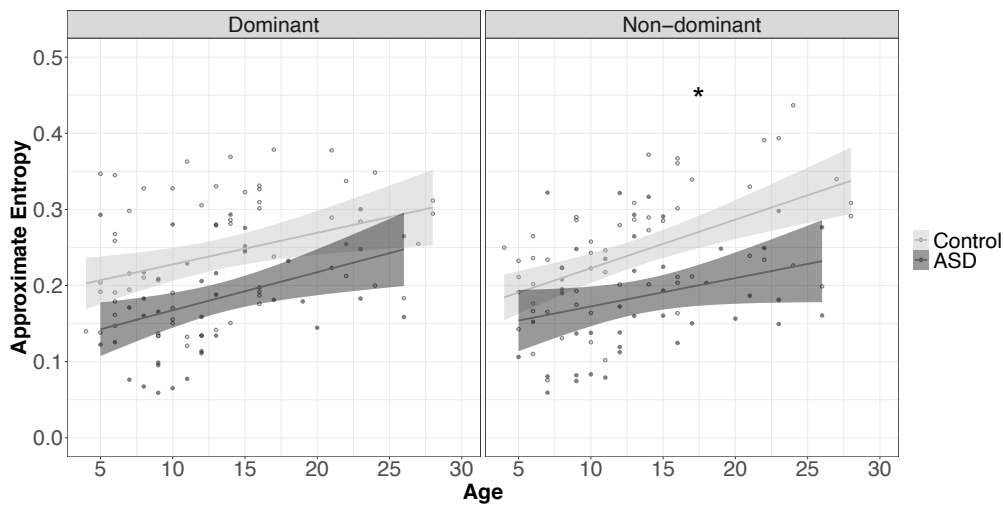

**Supplementary Figure 2.** Control participants show increased age-associated improvements in ApEn relative to ASD in the non-dominant hand only. Error bars reflect standard error of the mean. *\*slopes differ between groups*

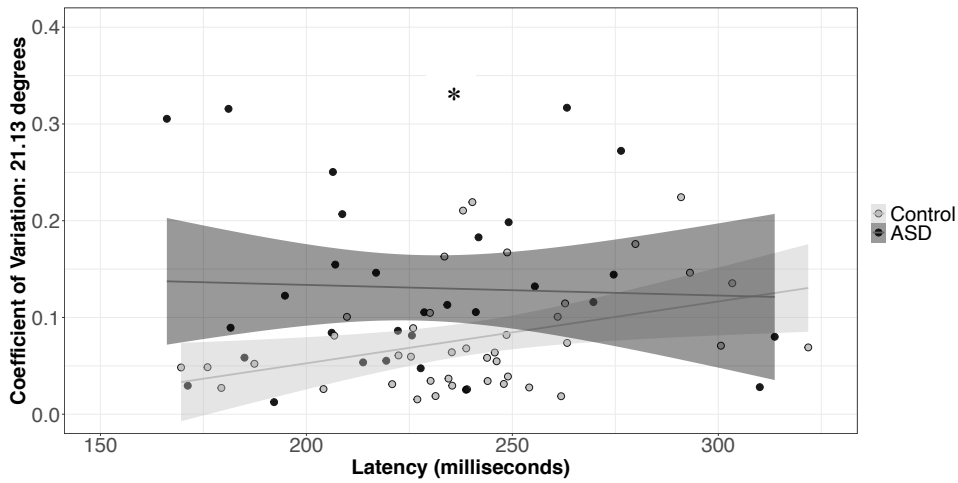

**Supplementary Figure 3.** Saccade latency was associated with increased CoV (21.13 degrees) in control participants, and the strength of this relationship was stronger in controls than in ASD ( $z = 2.00, p = .045$ ). *\*slopes differ between groups*

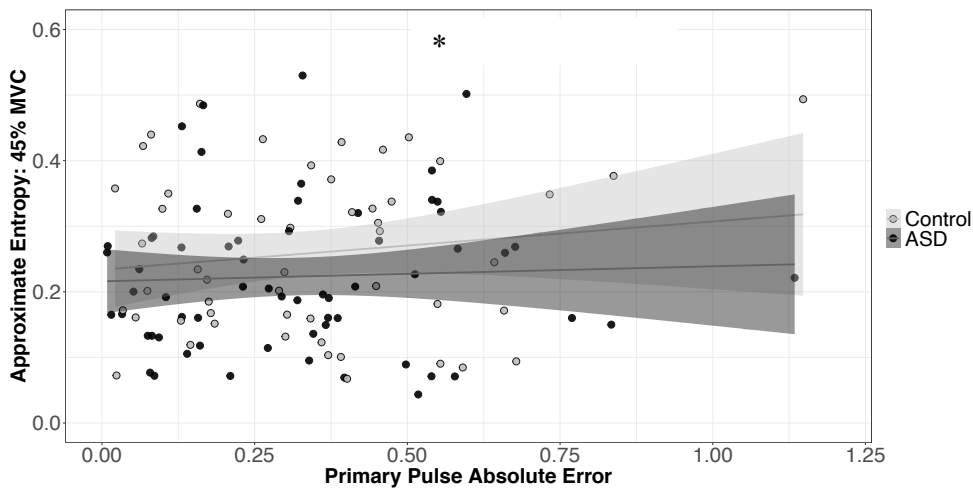

**Supplementary Figure 4.** In control participants, increased saccade error was associated with reduced ApEn (15, 45, 85% MVC) and the strength of this association was stronger in controls than in ASD (45%;  $z = -2.43, p = .015$ ). *\*slopes differ between groups*
